# Supplementary material for: Multimodal layer-by-layer nanoparticles: a breakthrough in gene and drug delivery for osteosarcoma
Source: Royal Society of Chemistry journal article supplement (doi:10.1039/d4tb01541j), 2024-01-01

### Supplementary material

#### Multimodal Layer-by-Layer nanoparticles: a breakthrough in gene and drug delivery for Osteosarcoma

Eugenia Crisafulli, Annachiara Scalzone, Chira Tonda-Turo, Joel Girón-Hernández, Piergiorgio Gentile

**Table S1.** Values of explanatory variables: homogenisation speed (rpm) ( $X_1$ ), homogenisation time (s) ( $X_2$ ) and response variable: size (nm) ( $Y_1$ ) and  $\zeta$ -potential value (mV) ( $Y_2$ ). The table includes also the PDI value for each run.

| Run | $X_1$ ,<br>Homogenisation<br>speed (rpm) | $X_2$ ,<br>Homogenisation<br>time (s) | $Y_1$ ,<br>Size (nm) | $Y_2$ ,<br>$\zeta$ -potential<br>value (mV) | PDI (%) |
|-----|------------------------------------------|---------------------------------------|----------------------|---------------------------------------------|---------|
| 1   | 20000                                    | 30.0                                  | 311.3                | +38.4                                       | 30.1    |
| 2   | 16893                                    | 75.0                                  | 370.6                | +28.6                                       | 61.9    |
| 3   | 27500                                    | 138.6                                 | 242.6                | +34.2                                       | 20.9    |
| 4   | 20000                                    | 120.0                                 | 346.0                | +23.0                                       | 27.2    |
| 5   | 27500                                    | 75.0                                  | 196.4                | +30.6                                       | 11.1    |
| 6   | 27500                                    | 75.0                                  | 209.6                | +36.5                                       | 16.7    |
| 7   | 27500                                    | 75.0                                  | 196.7                | +38.9                                       | 19.3    |
| 8   | 35000                                    | 30.0                                  | 196.7                | +38.9                                       | 32.6    |
| 9   | 27500                                    | 75.0                                  | 249.9                | +11.1                                       | 18.5    |
| 10  | 38106                                    | 75.0                                  | 276.6                | +25.0                                       | 31.5    |
| 11  | 35000                                    | 120.0                                 | 259.0                | +30.7                                       | 42.1    |
| 12  | 27500                                    | 75.0                                  | 189.2                | +30.2                                       | 17.6    |
| 13  | 27500                                    | 11.4                                  | 302.5                | +17.0                                       | 50.3    |

The optimised conditions for manufacturing polyplexes with the minimum size (191.3 nm) were as follows: 29750 rpm of homogenisation speed and a homogenisation time of 79.5 seconds.

The optimised conditions for manufacturing polyplexes with the maximum  $\zeta$ -potential value (+39.4) were as follows: 38107 rpm of homogenisation speed and a homogenisation time of 138.6 seconds.

**Figure S1.** Scheme of the procedure to manufacture the miR-NPs polyplexes.

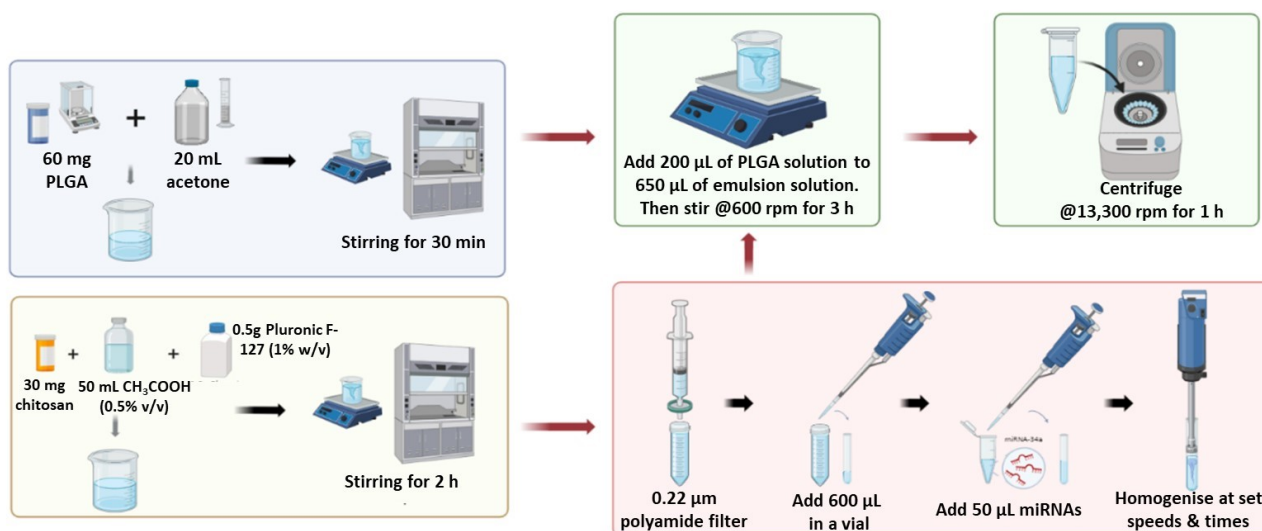

**Figure S2.** Scheme of the procedure to manufacture LbL-NPs by functionalisation of the preformed polyplexes using the LbL assembly.

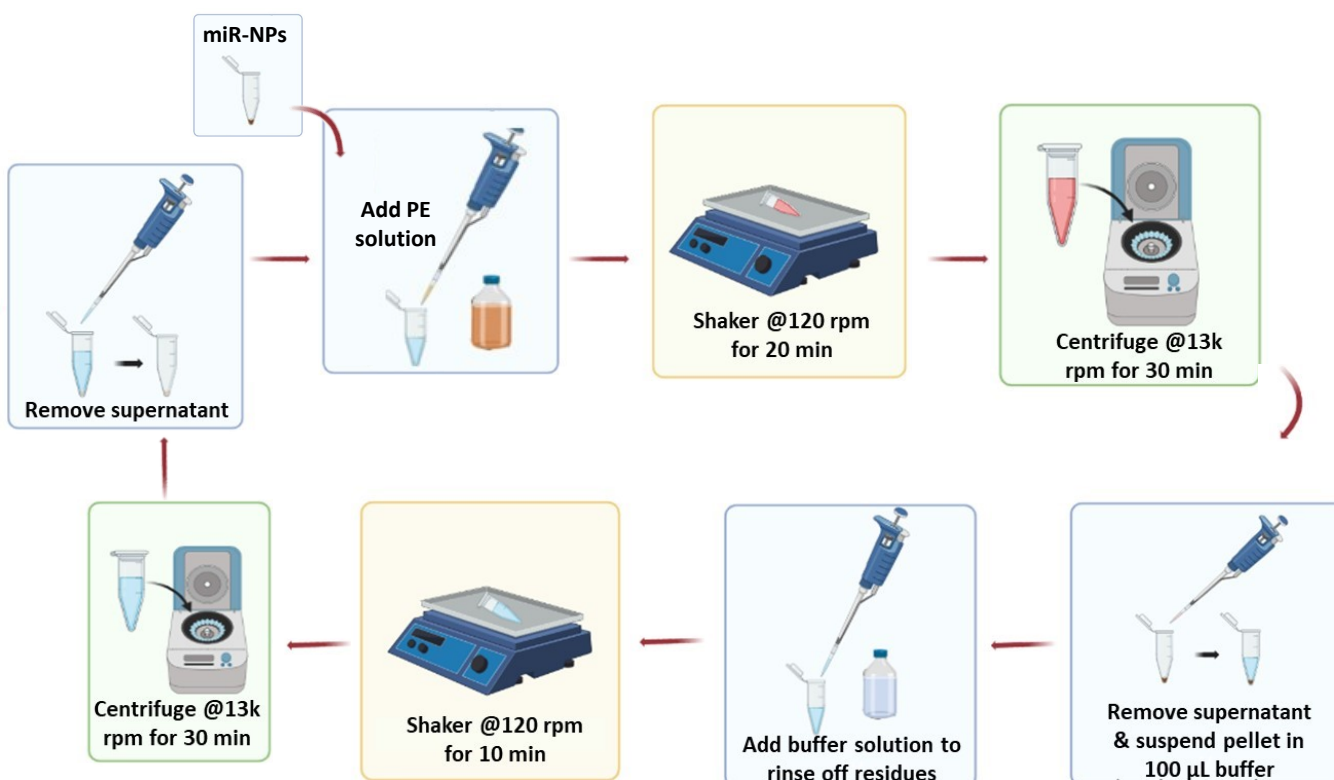

**Figure S3.** Live and dead images of non-treated Saos-2 and U2OS cells in 2D culture at different time points.

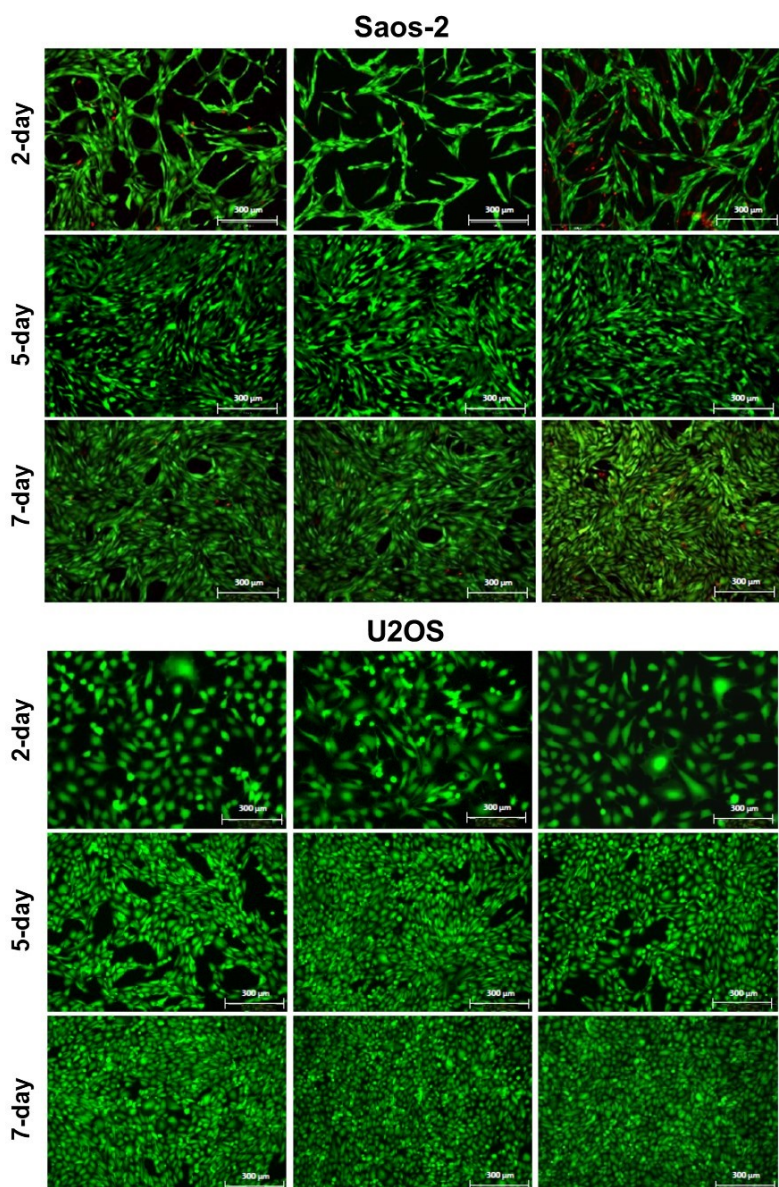

Supplement: d4tb01541j1.pdf [file d4tb01541j1.pdf]
